# Supplementary material for: Accuracy of epidemiological inferences based on publicly available information: retrospective comparative analysis of line lists of human cases infected with influenza A(H7N9) in China
Source: PubMed Central journal article supplement (PMC4066833; doi:10.1186/1741-7015-12-88), 2014-05-28
Supplement: 1741-7015-12-88-S3.pdf [file 1741-7015-12-88-S3.pdf]

## Introduction

We compared the five line lists based on publicly available information (HealthMap, Virginia Tech, Bloomberg, HKUSPH, FluTrackers) with the official China CDC line list, in terms of data accuracy, missingness and various epidemiological parameters in Figures S1-S6. Date of analysis refers to US local time for HealthMap, Virginia Tech and FluTrackers line lists, and China local time for China CDC, Bloomberg and HKUSPH line lists. Here we provided additional details of the figures.

In Figure S1, we matched the cases from the five line lists to the official China CDC line list. More exact criteria were applied in the first round of matching, allowing for missing values in one of the four matching variables. In the second round of matching the remaining cases were matched allowing for larger discrepancy and missing values in two of the four matching variables.

Some of the variables were not collected by the line lists. In Figure S2 and S3, HealthMap did not collect data on hospitalization admission and discharge dates. Virginia Tech, HKUSPH and FluTrackers did not collect data on discharge dates. In Figure S6, HealthMap did not collect data on hospitalization status and severe cases. Bloomberg did not collect data on severe cases.

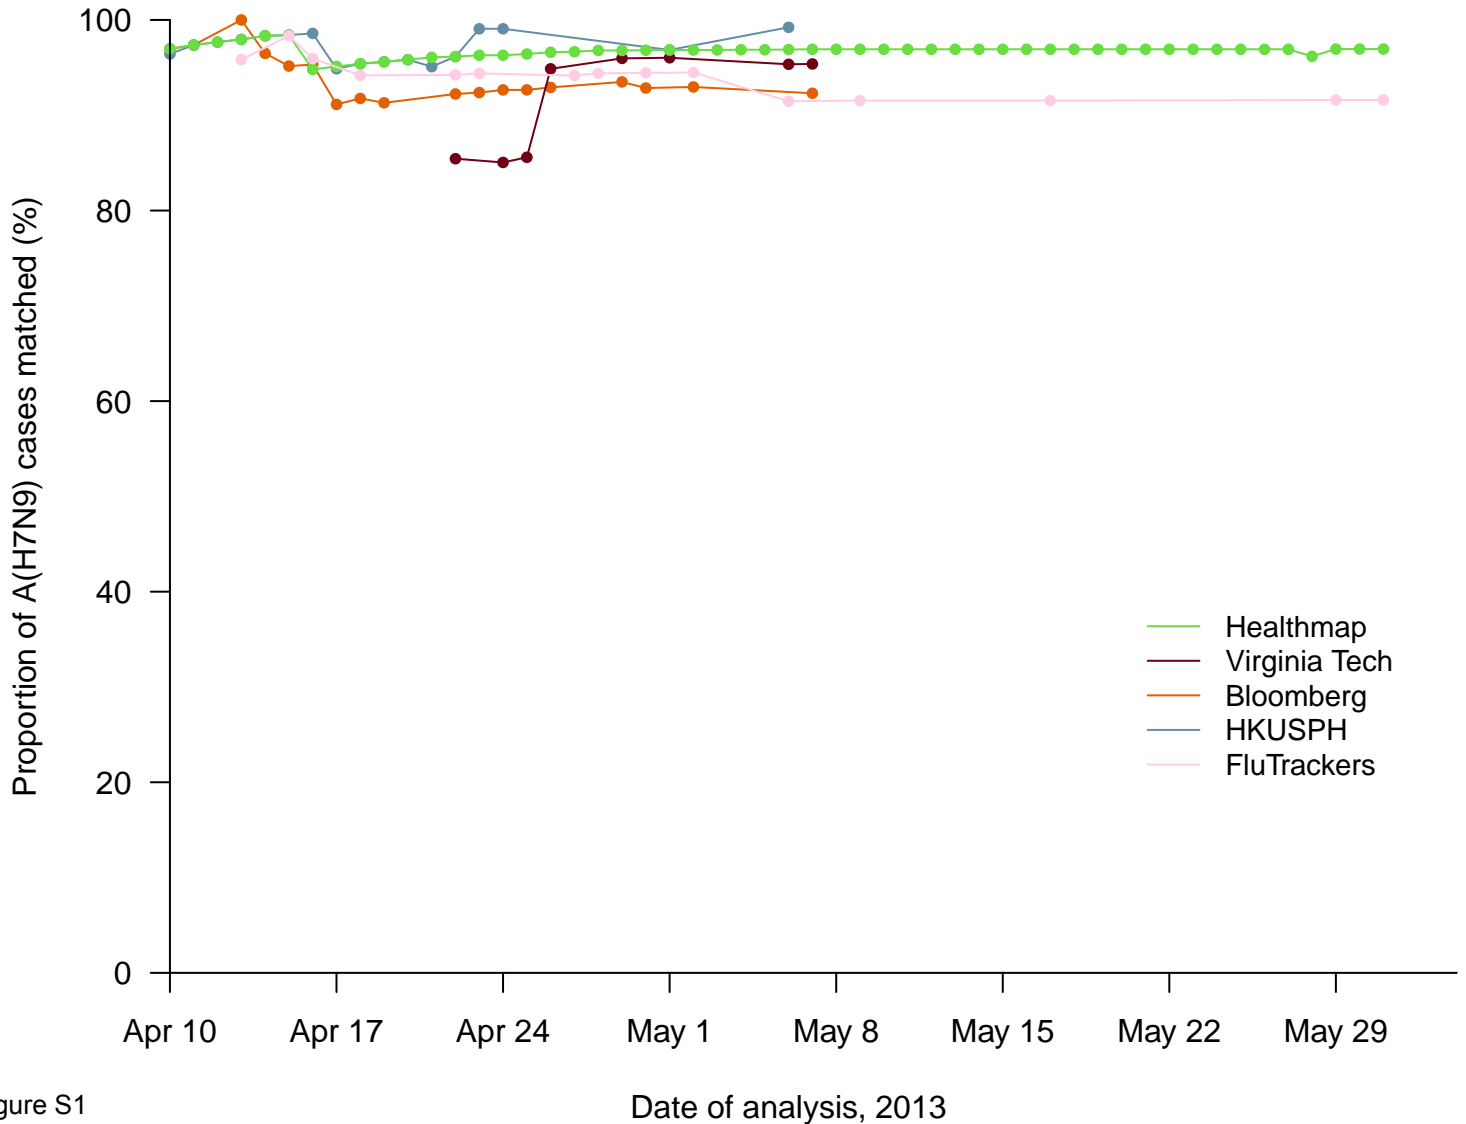

Figure S1



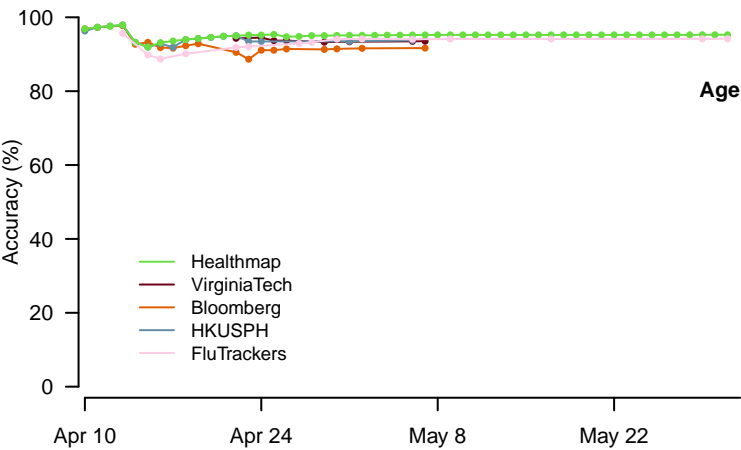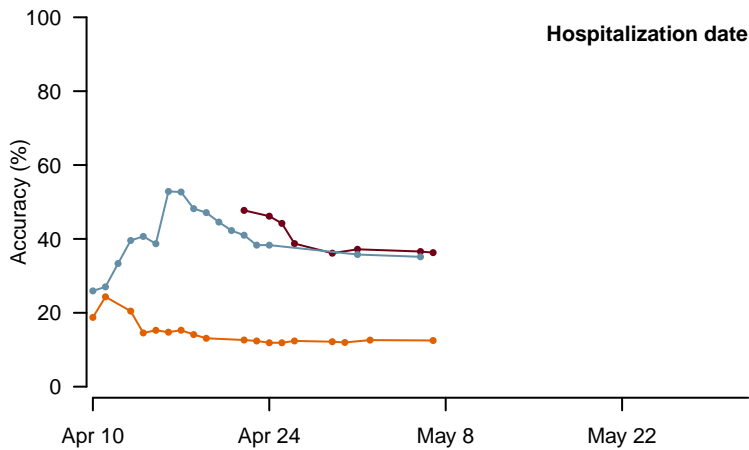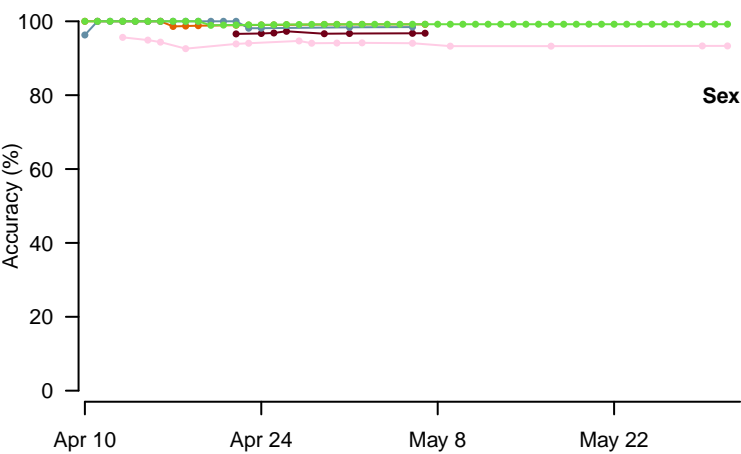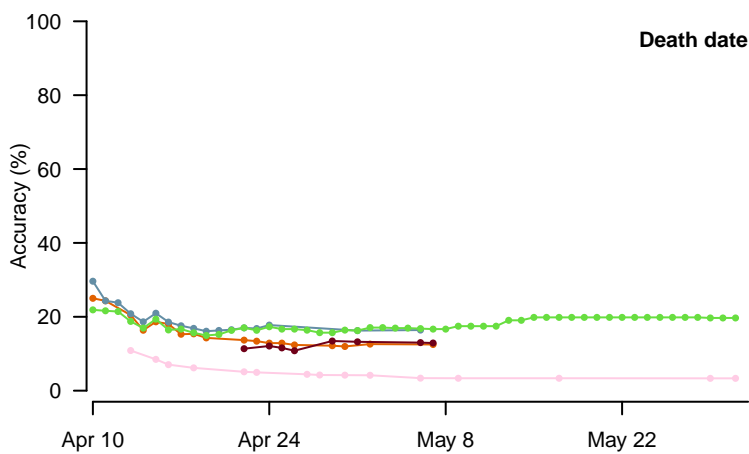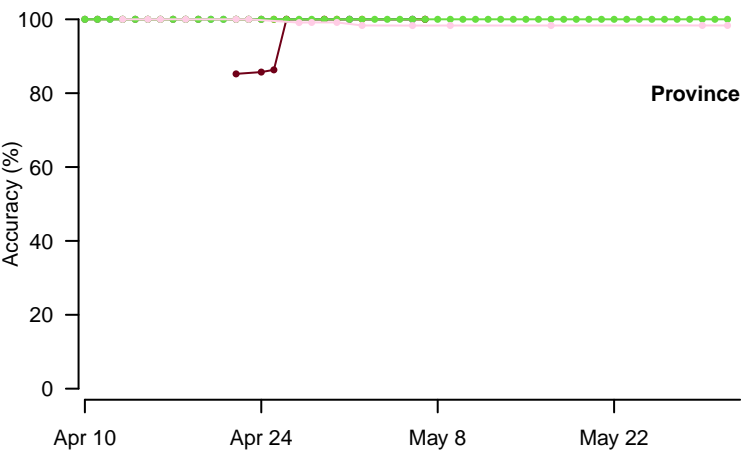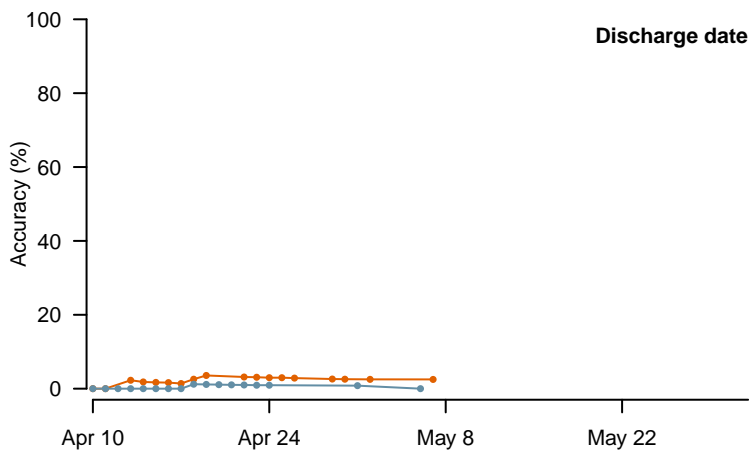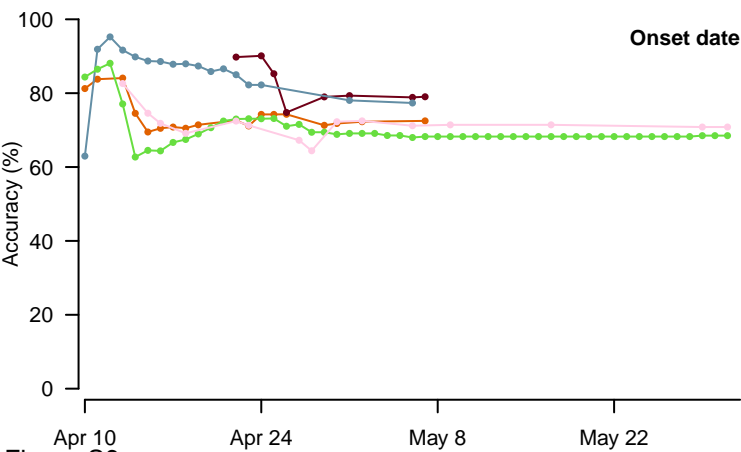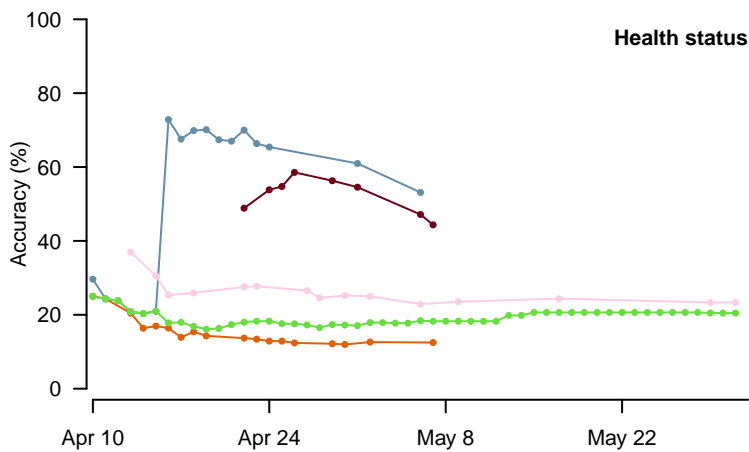

Figure S3 Date of analysis, 2013

Date of analysis, 2013

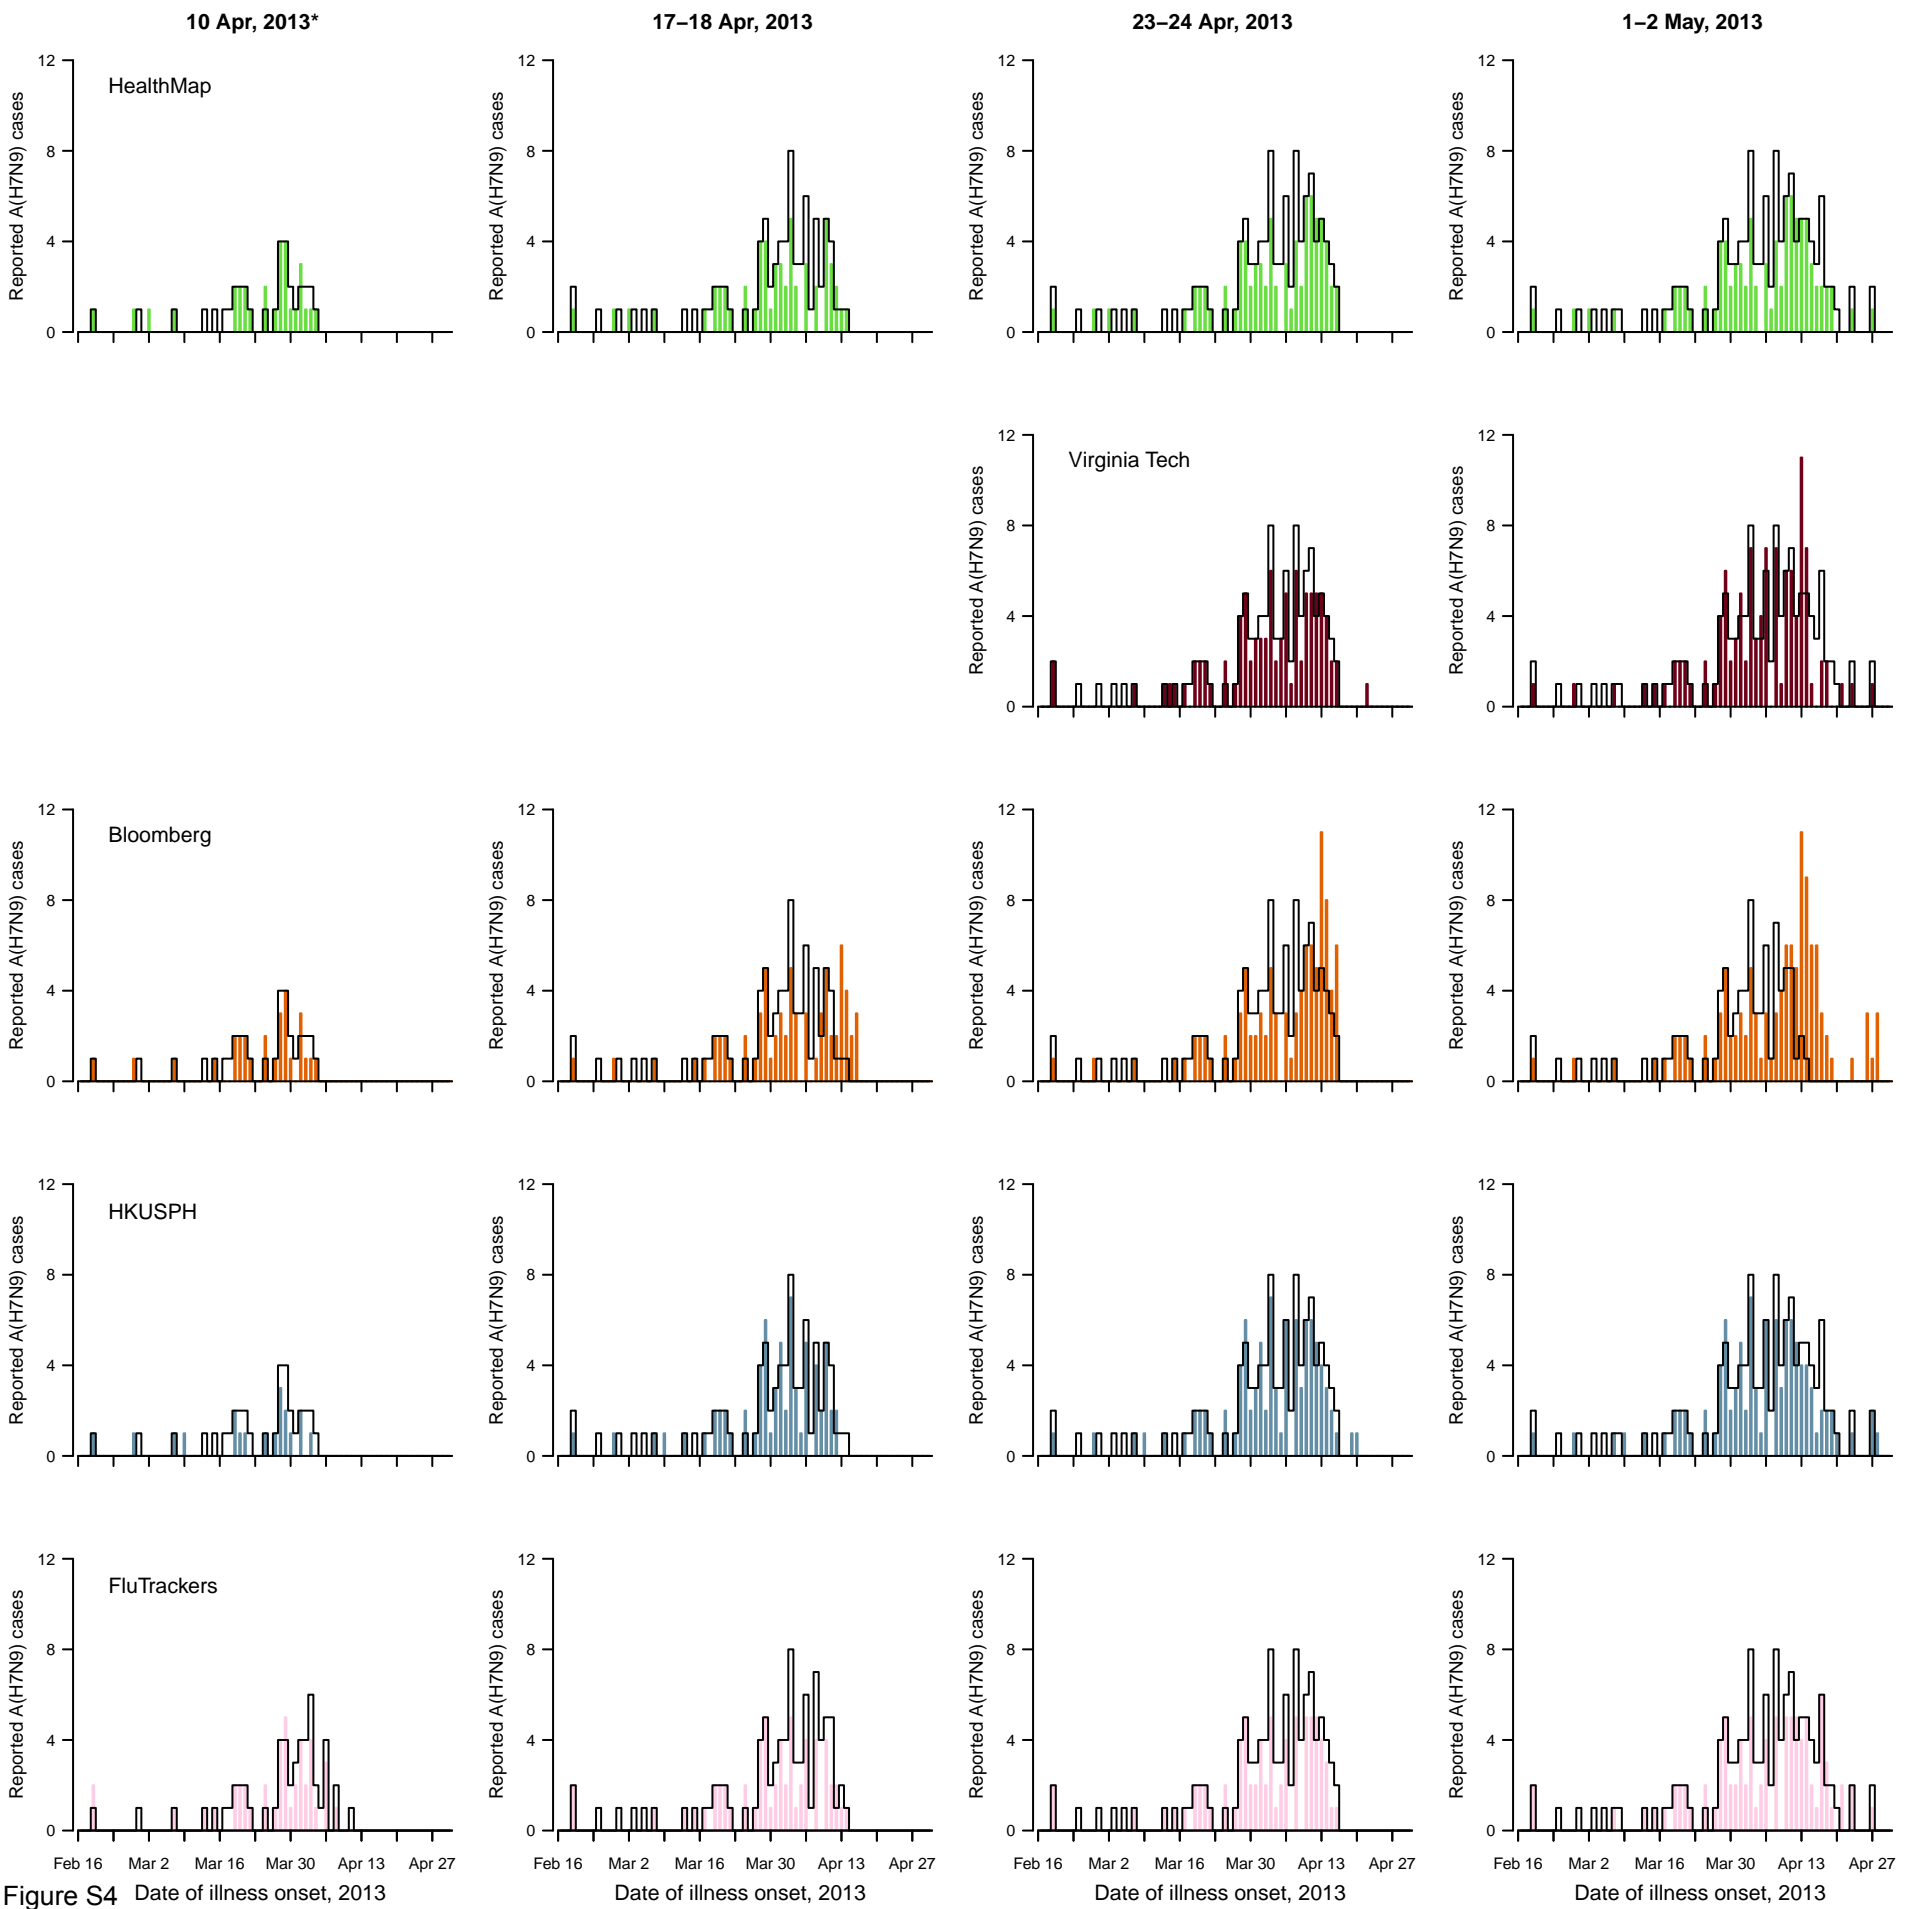

Figure S4 Date of illness onset, 2013

Onset to hospitalization

Onset to death

Onset to discharge

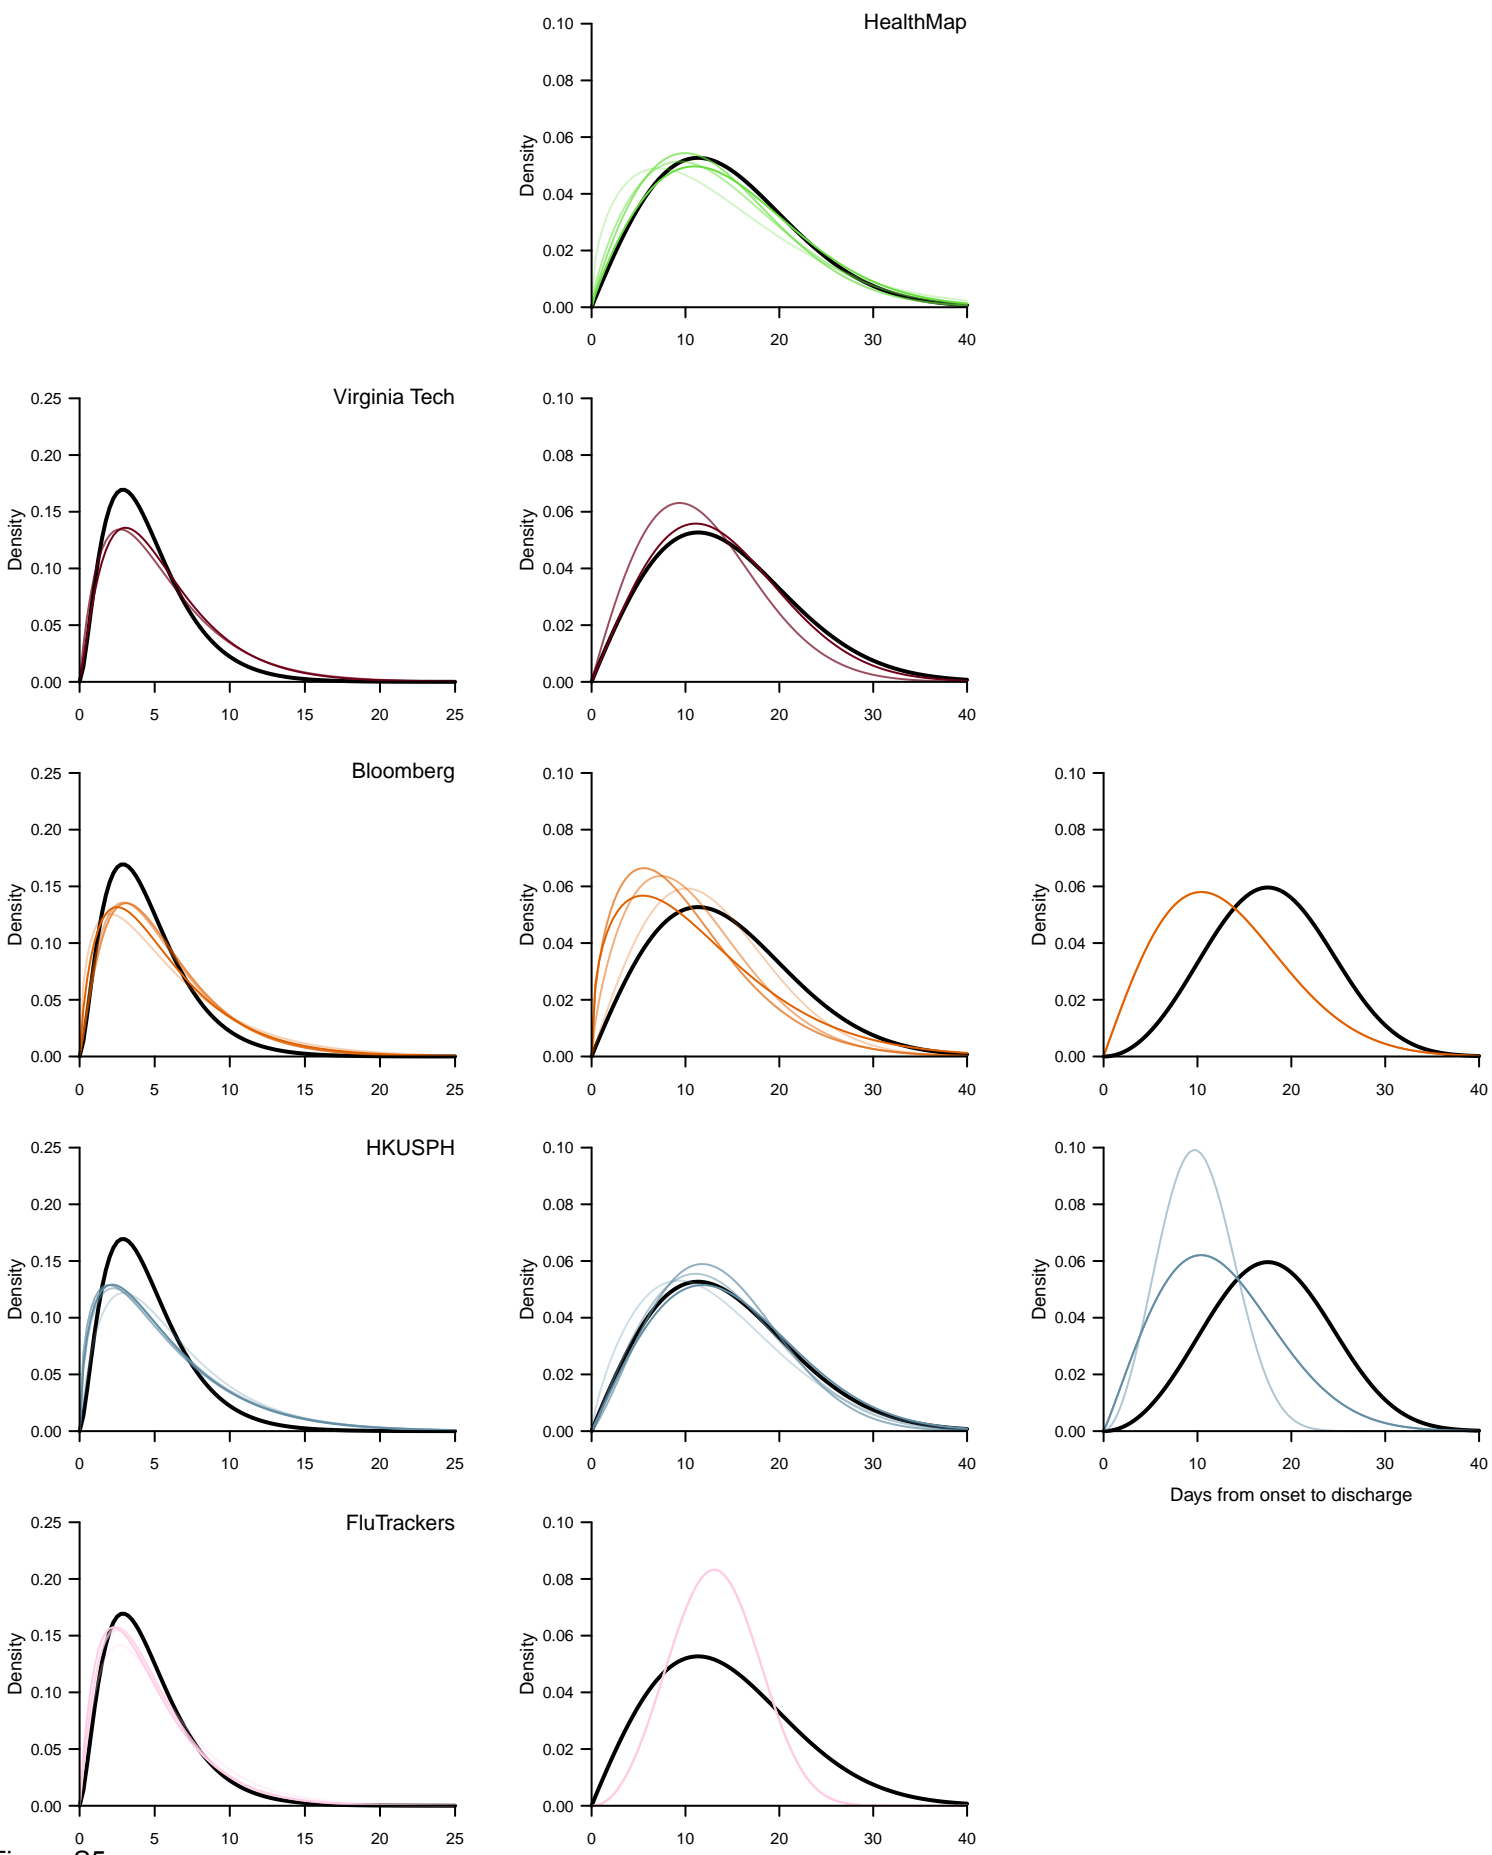

Figure S5 Days from onset to hospitalization

Days from onset to death

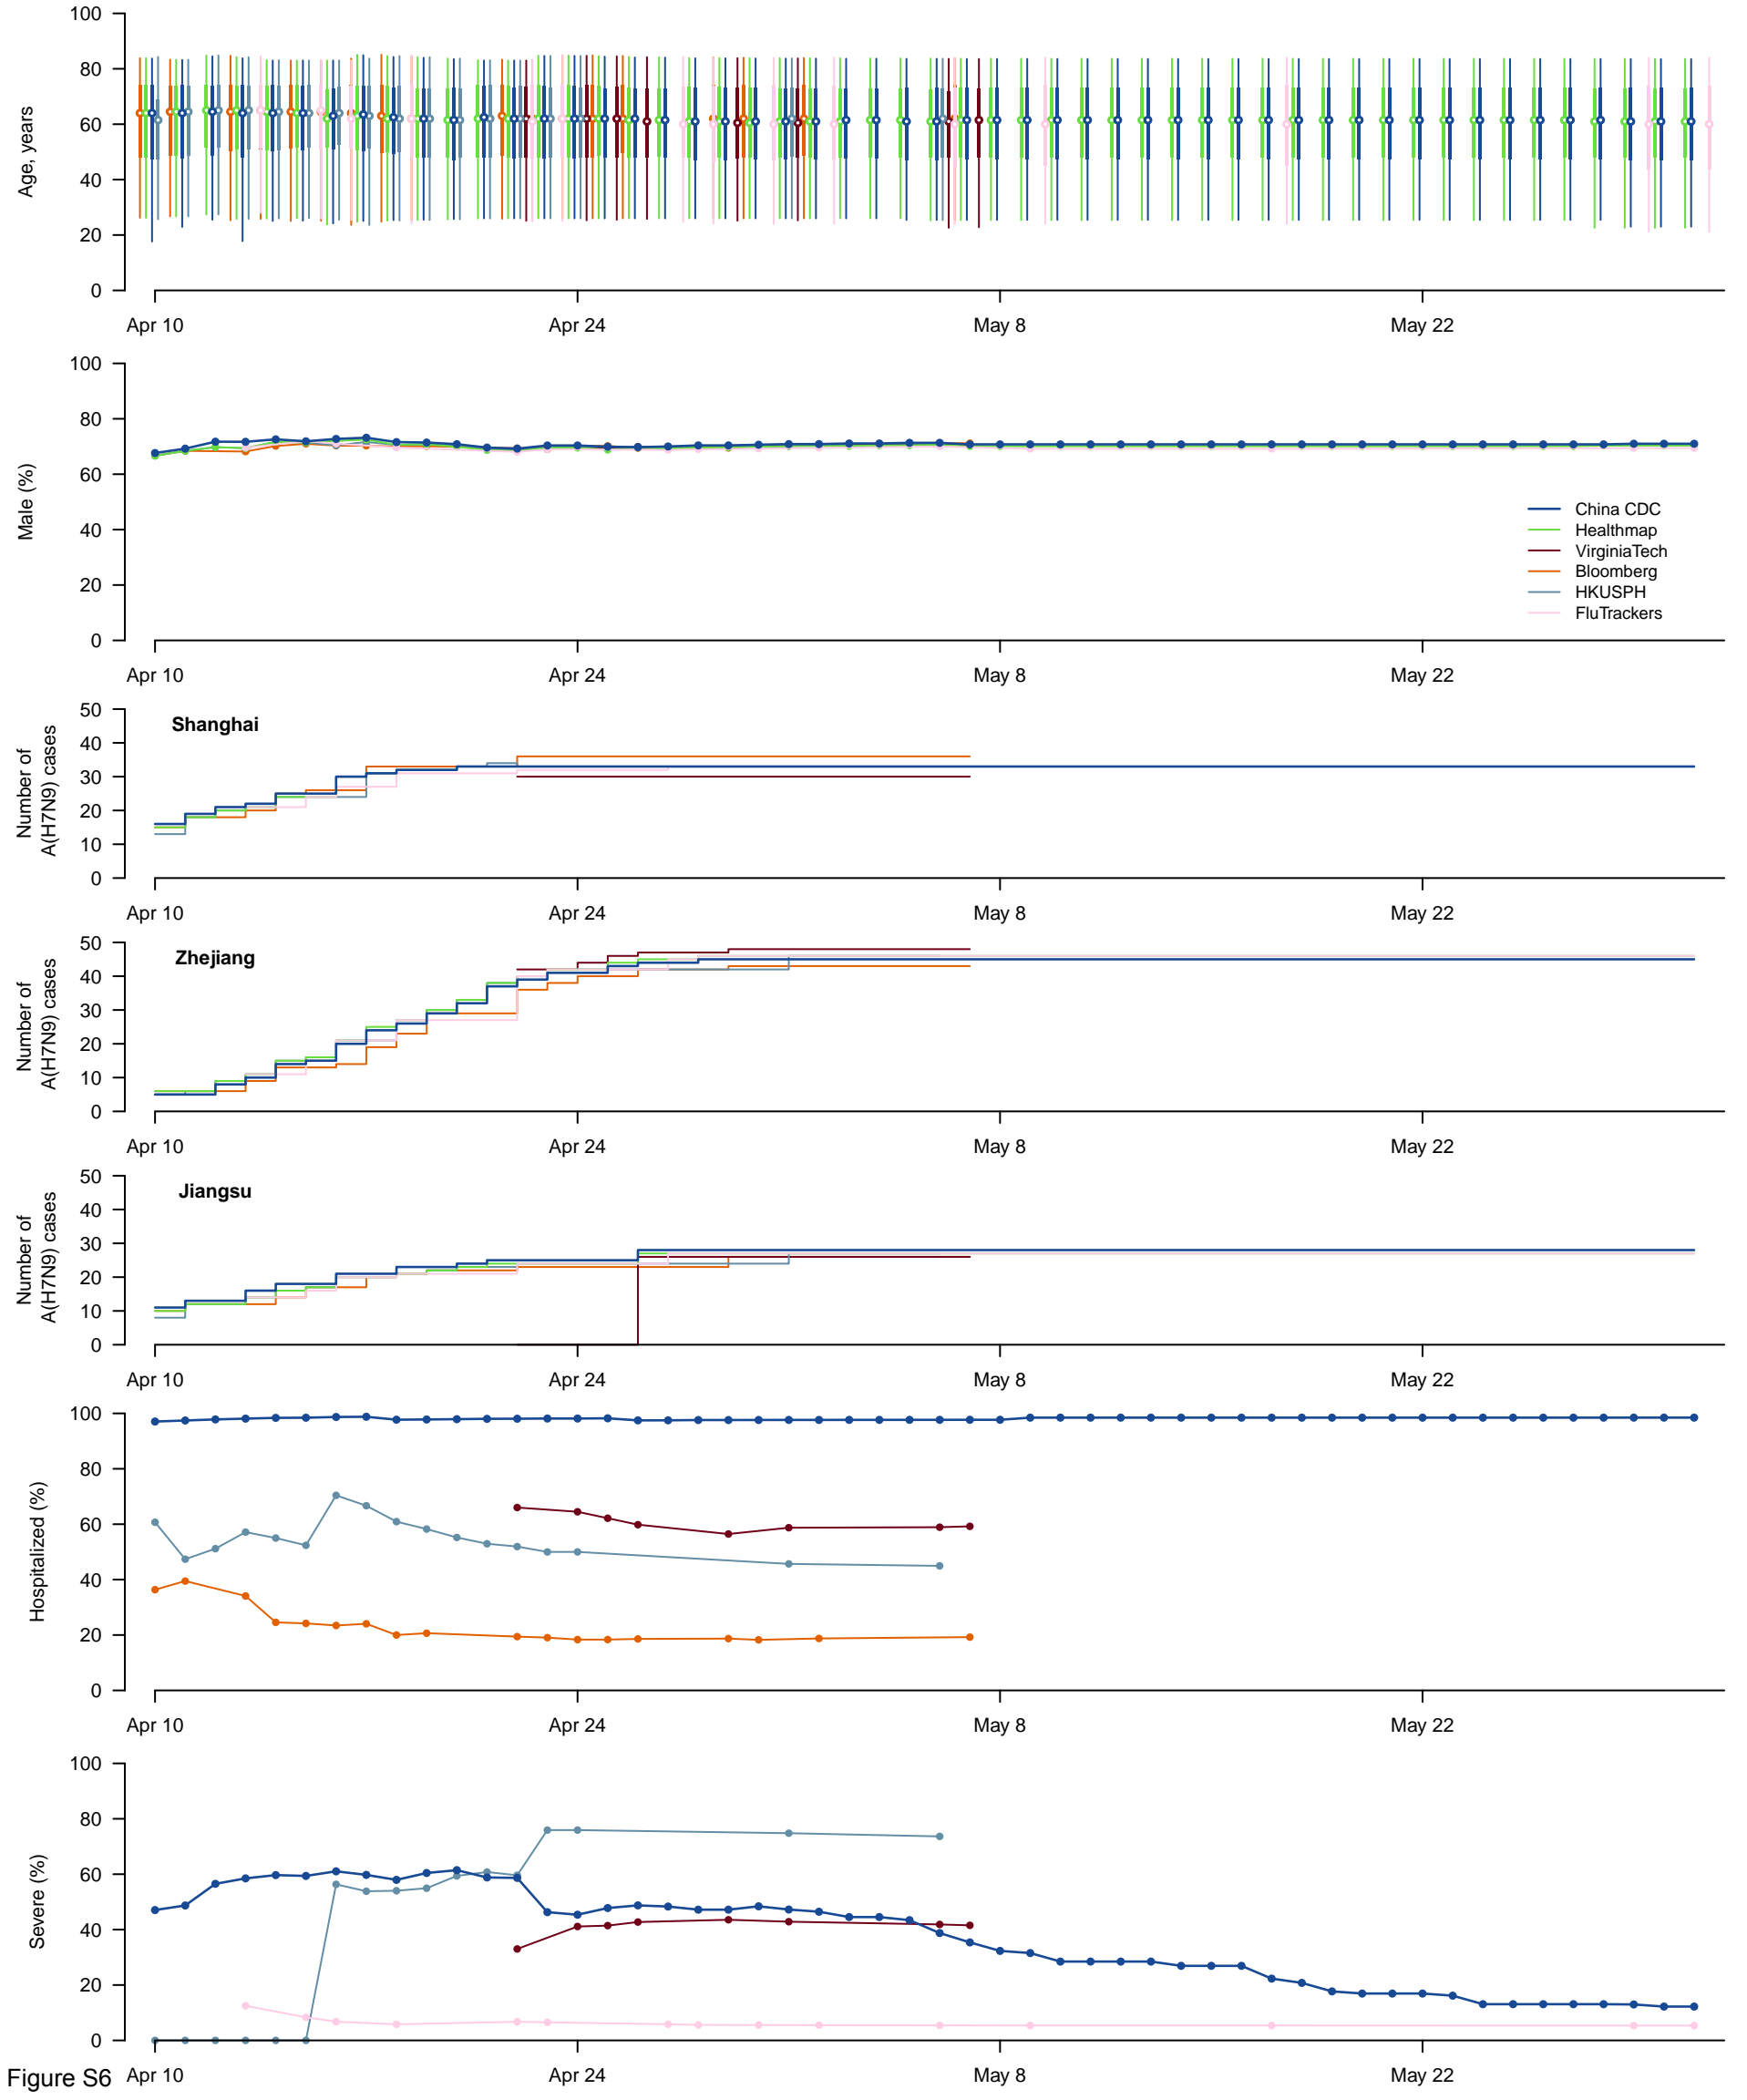

Figure S6
